# Supplementary material
Source: Copernicus journal article supplement (doi:10.5194/acp-26-8225-2026)
Supplement: Supplementary file 1 [file acp-26-8225-2026-supplement.pdf]

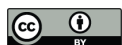

*Supplement of*

## **Correcting aerosol extinction coefficient vertical structure biases in GEOS-chem via a physics-informed transformer with physical mechanism diagnosis**

**Jiajun Xiong et al.**

*Correspondence to:* Yi Wang ([wangyi34@cug.edu.cn](mailto:wangyi34@cug.edu.cn))

The copyright of individual parts of the supplement might differ from the article licence.

## 22 **S1. CALIOP Quality Control**

23 To ensure the reliability of the observational target, we implement a rigorous,  
24 tiered quality control strategy for the CALIOP Level 2 aerosol profile data. First, to  
25 minimize cloud contamination, profiles with a Cloud Layer Fraction (CLF) exceeding  
26 2.0 were excluded. We further refined this dataset by applying strict thresholds to the  
27 Cloud Aerosol Discrimination (CAD) score, retaining only retrievals with high  
28 confidence (CAD score between -100 and -20). The Extinction QC flag was used to  
29 filter for algorithmically stable solutions (unconstrained or constrained), rejecting  
30 profiles with divergent retrieval errors. Adjustments to lidar ratios or opaque layer  
31 identifications were permitted only when necessary for algorithm convergence. A final  
32 multi-step refinement was applied to the vertical profiles: (1) profiles were discarded if  
33 the extinction uncertainty exceeded  $99.9 \text{ km}^{-1}$  at any lower-altitude layer; (2) physically  
34 unrealistic extinction coefficients greater than  $2 \text{ km}^{-1}$  were flagged and removed; and  
35 (3) to mitigate surface contamination artifacts, data within 180 m of the terrain were  
36 excluded. Observations classified as "clear air" were assigned an extinction coefficient  
37 of  $0 \text{ km}^{-1}$ , with the exception of the lowest 180 m AGL, which was masked to avoid  
38 surface return interference. Additional safeguards included the removal of high-altitude  
39 data ( $>4 \text{ km}$ ) near  $0^\circ\text{C}$  ice clouds and the exclusion of spatially isolated aerosol signals  
40 (horizontal resolution  $< 80 \text{ km}$ ).

## 41 S2. AERONET AOD Interpolation

42 Standard AERONET sun photometers do not measure AOD directly at 532 nm,  
43 the operating wavelength of the CALIOP lidar and our GEOS-Chem configuration. To  
44 enable direct comparison, we interpolated the AOD to 532 nm using the Ångström  
45 exponent ( $\alpha$ ) derived from measurements at adjacent wavelengths (typically 500 nm  
46 and 675 nm, or 440 nm/870 nm if necessary). The interpolation follows the power-law  
47 relationship:

$$48 \quad \tau_{532} = \tau_{\lambda_1} \times \left(\frac{532}{\lambda_1}\right)^{-\alpha}$$
$$49 \quad \alpha = -\frac{\ln\left(\frac{\tau_{\lambda_1}}{\tau_{\lambda_2}}\right)}{\ln\left(\frac{\lambda_1}{\lambda_2}\right)}$$

50 where  $\tau$  represents the AOD at a specific wavelength  $\lambda$ . We prioritized the use  
51 of the 500 nm and 675 nm pair for calculating  $\alpha$  due to their proximity to 532 nm. In  
52 cases where data at 675 nm were unavailable, the 870 nm or 440 nm channels were  
53 used as secondary references. This processing ensures spectral consistency between the  
54 ground-based validation dataset and the model outputs.

55 **S3. Input Variable**

56 Table S1. Summary of input variables from MERRA-2 reanalysis and GEOS-Chem  
 57 model simulations used in this study, categorized by data source and physical property.

| Category                | Variable Name               | Physical Description                      |
|-------------------------|-----------------------------|-------------------------------------------|
| MERRA-2<br>(3D Fields)  | T                           | Air Temperature (3D)                      |
|                         | U, V                        | Eastward & Northward Wind Components      |
|                         | OMEGA                       | Vertical Pressure Velocity                |
|                         | QV                          | Specific Humidity                         |
|                         | RH                          | Relative Humidity                         |
|                         | CLOUD                       | Cloud Fraction                            |
|                         | OPTDEPTH                    | In-cloud Optical Thickness                |
|                         | QI, QL                      | Mass Fraction of Cloud Ice / Liquid Water |
|                         | TAUCLI, TAUCLW              | Optical Thickness (Ice / Liquid Clouds)   |
|                         | DTRAIN                      | Detrainment Mass Flux                     |
|                         | CMFMC                       | Cumulative Mass Flux                      |
|                         | PFICU, PFILSAN              | Ice Precipitation Flux (Conv / LS)        |
|                         | PFLCU, PFLLSAN              | Liquid Precipitation Flux (Conv / LS)     |
|                         | DQRCU, DQRLSAN              | Rainwater Source (Conv / LS)              |
|                         | REEVAPCN,<br>REEVAPLS       | Evaporation of Precip (Conv / LS)         |
| PV                      | Ertel's Potential Vorticity |                                           |
| MERRA-2<br>(Surface/2D) | PS, SLP                     | Surface Pressure / Sea Level Pressure     |
|                         | TS, T2M, T10M               | Skin Temp / 2m Temp / 10m Temp            |
|                         | U10M, V10M                  | 10-meter Wind Components                  |
|                         | QV2M / Q850                 | Specific Humidity (2m / 850hPa)           |

|                      |                                          |
|----------------------|------------------------------------------|
| PBLH                 | Planetary Boundary Layer Height          |
| PRECTOT              | Total Precipitation                      |
| PRECCON, PRECLSC     | Precipitation (Convective / Large Scale) |
| PRECANV, PRECSNO     | Precipitation (Anvil / Snow)             |
| SNODP / SNOMAS       | Snow Depth / Snow Mass                   |
| ALBEDO               | Surface Albedo                           |
| CLDTOT               | Total Cloud Area Fraction                |
| SWGDN                | Incident Shortwave Flux                  |
| LWGNT, LWTUP         | Net Downward / Upward Longwave Flux      |
| EFLUX, HFLUX         | Latent / Sensible Heat Flux              |
| EVAP                 | Surface Evaporation                      |
| GWETROOT,<br>GWETTOP | Soil Wetness (Root / Top)                |
| LAI, GRN             | Leaf Area Index / Greenness              |
| FRSNO, FRSEAICE      | Fraction of Snow / Sea Ice               |
| SEAICE00-90          | Sea Ice Fraction (Binned 00-90)          |
| TO3                  | Total Column Ozone                       |
| TROPPT               | Tropopause Pressure                      |
| USTAR, Z0M           | Friction Velocity / Roughness Length     |
| LWI                  | Land Water Indicator                     |
| PARDF, PARDR         | PAR (Diffuse / Direct)                   |

---

|                                |                                       |                                        |
|--------------------------------|---------------------------------------|----------------------------------------|
| GEOS-Chem<br>(Aerosol<br>Mass) | AerMassSO <sub>4</sub>                | Sulfate Aerosol Mass                   |
|                                | AerMassBC,<br>AerMassPOA              | Black Carbon / Primary Organic Aerosol |
|                                | AerMassOPOA                           | Oxidized Primary Organic Aerosol       |
|                                | AerMassNIT,<br>AerMassNH <sub>4</sub> | Nitrate / Ammonium Aerosol Mass        |

|                               |                                                             |                                           |
|-------------------------------|-------------------------------------------------------------|-------------------------------------------|
|                               | AerMassSAL                                                  | Sea Salt Aerosol Mass                     |
|                               | AerMassSOA*                                                 | Secondary Organic Aerosol                 |
|                               | AerMassHMS                                                  | Hydroxymethanesulfonate Aerosol           |
|                               | AerMassLVOCOA                                               | Low Volatility Oxygenated OA              |
|                               | TotalOA                                                     | Total Organic Aerosol                     |
|                               | PM <sub>2.5</sub> , PM <sub>10</sub>                        | PM <sub>2.5</sub> / PM <sub>10</sub> Mass |
|                               | EC_gc                                                       | Elemental Carbon Tracer                   |
| GEOS-Chem<br>(Optics/Micro)   | AODHyg532nm_*                                               | Hygroscopic AOD at 532nm                  |
|                               | AODDust                                                     | Dust Optical Depth                        |
|                               | AerHygroscopicGrowth_*                                      | Hygroscopic Growth Factors                |
|                               | AerSurfAreaHyg_*                                            | Hygroscopic Aerosol Surface Area          |
|                               | Chem_WetAeroRadi*                                           | Wet Aerosol Radius                        |
|                               | Chem_AeroRadi*                                              | Dry Aerosol Radius                        |
|                               | Chem_WetAeroArea*                                           | Wet Aerosol Surface Area                  |
|                               | Chem_AeroArea*                                              | Dry Aerosol Surface Area                  |
| GEOS-Chem<br>(Gas Species)    | SpeciesConc_SO <sub>2</sub>                                 | Sulfur Dioxide                            |
|                               | SpeciesConc_NO, NO <sub>2</sub>                             | Nitrogen Oxides                           |
|                               | SpeciesConc_O <sub>3</sub>                                  | Ozone                                     |
|                               | SpeciesConc_NH <sub>3</sub>                                 | Ammonia                                   |
|                               | SpeciesConc_HNO <sub>3</sub>                                | Nitric Acid                               |
|                               | SpeciesConc_CO                                              | Carbon Monoxide                           |
|                               | SpeciesConc_OH                                              | Hydroxyl Radical                          |
|                               | SpeciesConc_HO <sub>2</sub> , H <sub>2</sub> O <sub>2</sub> | Hydroperoxyl / Hydrogen Peroxide          |
| SpeciesConc_CH <sub>2</sub> O | Formaldehyde                                                |                                           |

SpeciesConc\_VOCs

VOCs (Isoprene, MVK, MACR, Aromatics...)

SpeciesConc\_S-Map

Sulfur Species (DMS, MSA, HMS)

---

## 59 S4. Detailed Architecture of the Transformer Components

### 60 a. Heterogeneous Input Embedding Strategies

61 Unlike the standard Transformer which uses a uniform positional encoding, we  
62 adopt distinct embedding strategies tailored to the physical nature of each input variable:

63 ① **Hybrid Vertical Height Encoding:** To capture the stratification of the atmosphere,  
64 we combine a learnable discrete embedding with a continuous linear projection. For a  
65 vertical layer with index  $l$  and geopotential height value  $h_l$ :

$$66 \quad e_{height}^{(l)} = Linear \left( Concat(E_{idx}[l], Linear(h_l)) \right) \quad (S1)$$

67 where  $E_{idx}$  is a learnable lookup table for layer indices.

68 ② **Cyclic Spatiotemporal Encoding:** For variables with intrinsic periodicity (i.e.,  
69 Month, Latitude, Longitude), we utilize trigonometric cyclic encoding to preserve their  
70 continuity (e.g., ensuring December is numerically close to January). For a variable  $v$   
71 with a period  $T$  (e.g.,  $T=12$  for months,  $T=360$  for longitude), the encoding is defined  
72 as:

$$73 \quad e_{cyclic} = Linear \left( \left[ \sin \left( \frac{2\pi v}{T} \right), \cos \left( \frac{2\pi v}{T} \right) \right] \right) \quad (S2)$$

74 ③ **Categorical Embedding:** Binary variables (e.g., Day/Night flag  $d \in \{0,1\}$ ) are  
75 mapped to dense vectors using standard learnable embeddings:

$$76 \quad e_{dn} = E_{dn}[d] \quad (S3)$$

### 77 b. Variable Identity Embedding

78 For the global context inputs  $X_{global} \in \mathbb{R}^{N_{var}}$ , where each scalar  $x_j$  represents a  
79 distinct physical variable (e.g., PBLH, Surface Pressure), we use a specialized  
80 projection:

$$81 \quad e_{global}^{(j)} = LayerNorm(x_j \cdot \omega_j + b_j + id_j) \quad (S4)$$

82 where  $\omega_j \in \mathbb{R}^{d_{model}}$  is a variable-specific projection vector (broadcasted  
83 multiplication),  $b_j$  is a bias term, and  $id_j$  is a learnable identity embedding unique to  
84 the  $j$ -th variable type. This ensures the model distinguishes between variables even if  
85 their scalar values are similar.

86 **c. Standard Multi-Head Self-Attention (MSA)**

87 The Transformer encoder utilizes MSA to capture dependencies between different  
88 vertical layers. For a given input sequence  $X$ , the attention output is calculated as:

$$89 \quad \text{Attention}(Q, K, V) = \text{Softmax}\left(\frac{QK^T}{\sqrt{d_k}}\right)V \quad (S5)$$

90 where  $Q = XW^Q$ ,  $K = XW^K$ , and  $V = XW^V$  are the query, key, and value matrices  
91 obtained through linear transformations. In our multi-head setting, the outputs are  
92 concatenated and linearly projected:

$$93 \quad \text{MSA}(Q, K, V) = \text{Concat}(\text{head}_1, \dots, \text{head}_h) W^O \quad (S6)$$

94 **d. Position-wise Feed-Forward Network (FFN)**

95 Each encoder layer includes a fully connected FFN with a GELU activation function:

$$96 \quad \text{FFN}(x) = \text{Linear}_2\left(\text{GELU}(\text{Linear}_1(x))\right) \quad (S7)$$

97 **e. Gated Feature Fusion**

$$98 \quad E_{local}^{(z)} = \sum_{k=1}^4 \alpha_k^{(z)} \cdot \text{Norm}(h_k^{(z)}) \text{ s.t. } \sum \alpha_k = 1 \quad (S8)$$

99 where  $h_k^{(z)}$  represents the embedding of the  $k$ -th feature group. The attention weights  
100  $\alpha_k^{(z)}$  are generated by a learnable gating network, allowing the model to autonomously  
101 identify and prioritize the most physically relevant information source for each specific  
102 altitude layer.

103 **f. Output Layer**

$$104 \quad \Delta_{AEC}^{pred} = \text{MLP}(H_{cross} + H_{phyche}) \cdot s + b \quad (S9)$$

105 Where  $\Delta_{AEC}^{pred}$  denotes the predicted systematic bias of the AEC. The parameters  $s$   
106 and  $b$  are learnable scaling and bias terms, respectively, introduced to adaptively map  
107 the normalized network outputs to the physical magnitude of extinction biases.

108 **g. Magnitude-Weighted Loss**

109 Aerosol extinction exhibits a high dynamic range and severe spatial heterogeneity,  
110 statistically dominated by near-zero background values (e.g., in the clean free

111 troposphere). Standard Mean Squared Error (MSE) treats all data points equally, which  
 112 often causes the model to over-fit these overwhelming background signals while under-  
 113 correcting the large systematic biases associated with severe pollution episodes. To  
 114 resolve this imbalance, we propose a Magnitude-Weighted Loss ( $L_{MW}$ ).

115

$$116 \quad L_{MW} = \frac{1}{N} \sum_{i=1}^N (\Delta_{AEC}^{pred} - \Delta_{AEC}^{target})^2 \cdot \omega(\Delta_{AEC}^{target}) \quad (S10)$$

$$117 \quad \omega(\Delta_{AEC}^{target}) = |\Delta_{AEC}^{target}|^p + \lambda \cdot e^{-\beta |\Delta_{AEC}^{target}|} + \epsilon \quad (S11)$$

118 Here, the weight function  $\omega$  dynamically rescales the optimization penalty based on  
 119 the magnitude of the true bias ( $\Delta_{AEC}^{target}$ ), utilizing three empirically derived components.

120 (1) Large-Error Prioritization ( $|\Delta_{AEC}^{target}|^p$ ): Governed by the exponent  $p$ , this term  
 121 sharply amplifies the gradient for samples with massive simulation biases. It forces the  
 122 network to target critical GEOS-Chem failures, such as significantly underestimated  
 123 dust storms or heavy anthropogenic haze, rather than safely fitting the background  
 124 average. (2) False Alarm Penalty ( $\lambda \cdot e^{-\beta |\Delta_{AEC}^{target}|}$ ): Regulated by constants  $\lambda$  and  $\beta$ ,  
 125 this exponential decay applies a strict penalty when the true GEOS-Chem bias is  
 126 negligible but the model attempts a non-zero correction. Physically, this prevents the  
 127 generation of spurious aerosol artifacts in regions where the GEOS-Chem is already  
 128 accurate, such as the clean free troposphere. (3) Base Stability Term ( $\epsilon$ ): A minor  
 129 constant added to maintain numerical stability during gradient descent.

130

131 **S5. 5-fold Cross-Validation**

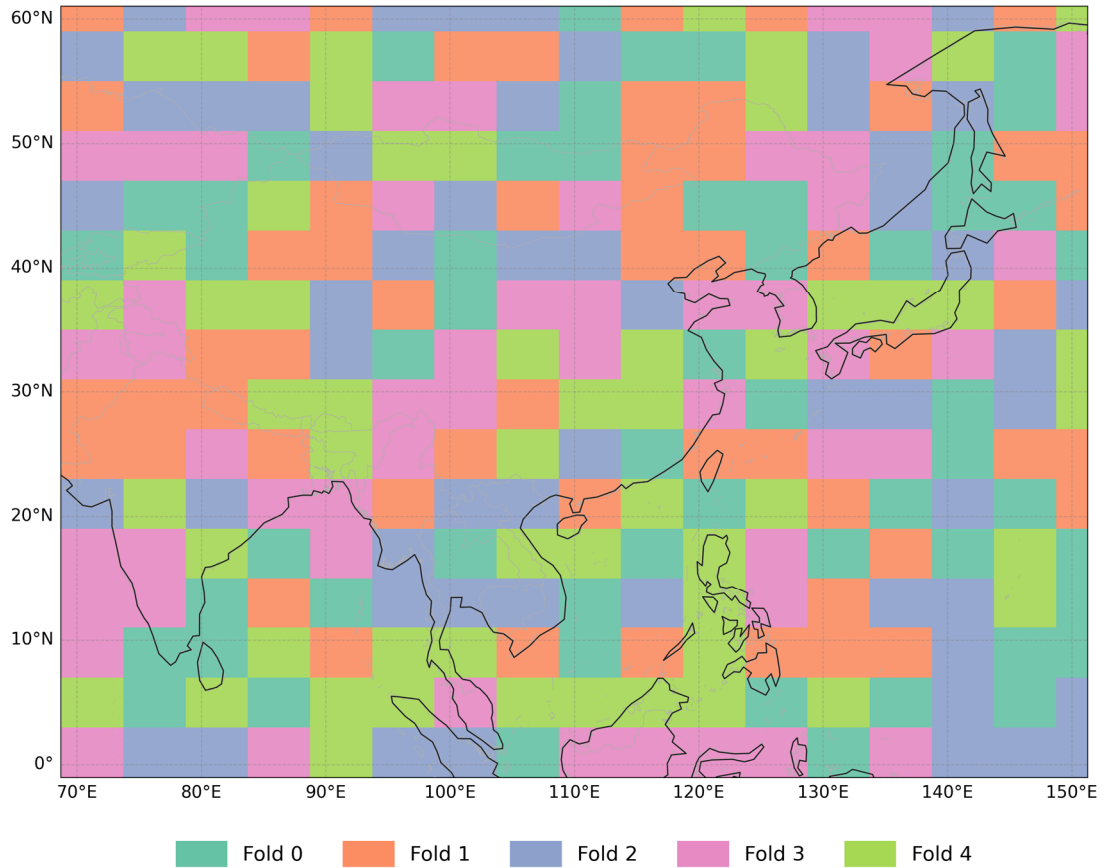

132

133 Figure S1. The illustration of the data splitting for the cross-validation. The color-coded  
134 checkerboard pattern represents the spatial partitioning of data into five folds used for  
135 model evaluation. Specifically, the geographical domain is divided into grid blocks,  
136 which are then randomly assigned to one of the five folds.

137 **S6. Statistical Evaluation Metrics**

138 To quantify the model performance in reconstructing AEPs, the following  
 139 statistical metrics are employed. Let  $\Delta_{AEC}^{target}_i$  and  $\Delta_{AEC}^{pred}_i$  denote the observed  
 140 (CALIOP) and predicted (Model) AEC for the  $i$ -th sample, respectively, and  $N$  be the  
 141 total number of samples.

142 **a. Pearson Correlation Coefficient ( $R$ )**

143 Reflects the linear consistency between predictions and observations:

144 
$$R = \frac{\sum_{i=1}^N (\Delta_{AEC}^{target}_i - \overline{\Delta_{AEC}^{target}}) (\Delta_{AEC}^{pred}_i - \overline{\Delta_{AEC}^{pred}})}{\sqrt{\sum_{i=1}^N (\Delta_{AEC}^{target}_i - \overline{\Delta_{AEC}^{target}})^2} \sqrt{\sum_{i=1}^N (\Delta_{AEC}^{pred}_i - \overline{\Delta_{AEC}^{pred}})^2}} \quad (S12)$$

145 where  $\overline{\Delta_{AEC}^{target}}$  and  $\overline{\Delta_{AEC}^{pred}}$  are the means of observed and predicted values.

146 **b. Error Magnitude Metrics**

147 ① Mean Absolute Error (MAE): Represents the average magnitude of errors.

148 
$$MAE = \frac{1}{N} \sum_{i=1}^N |\Delta_{AEC}^{target}_i - \Delta_{AEC}^{pred}_i| \quad (S13)$$

149 ② Root Mean Square Error (RMSE): Sensitive to large errors and outliers.

150 
$$RMSE = \sqrt{\frac{1}{N} \sum_{i=1}^N (\Delta_{AEC}^{target}_i - \Delta_{AEC}^{pred}_i)^2} \quad (S14)$$

151 **c. Normalized Root Mean Square Error (NRMSE)**

152 To compare performance across vertical layers with varying orders of magnitude in  
 153 extinction coefficients, we normalize the RMSE by the range of the observed data:

154 
$$NRMSE = \frac{RMSE}{\Delta_{AEC}^{target}_{max} - \Delta_{AEC}^{target}_{min}} \quad (S15)$$

155 where  $\Delta_{AEC}^{target}_{max}$  and  $\Delta_{AEC}^{target}_{min}$  are the maximum and minimum observed  
 156 extinction coefficients in the target dataset, respectively.

157 **d. Mean Bias (Bias)**

158 Used to diagnose systematic overestimation ( $Bias > 0$ ) or underestimation ( $Bias < 0$ ):

$$Bias = \frac{1}{N} \sum_{i=1}^N (\Delta_{AEC\ i}^{pred} - \Delta_{AEC\ i}^{target}) \quad (S16)$$

160 **S7. Mathematical Formulation of Interpretability Methods**

161 To quantify the contribution of different input features to the bias correction, we  
 162 employ ensemble-based interpretability methods. The mathematical definitions for the  
 163 Gradient-based Attribution, Attention Mechanism, and Permutation Feature  
 164 Importance are detailed below.

165 **a. Gradient-based Feature Attribution (Input  $\times$  Gradient)**

166 For the vertical profile inputs, we utilize the Input  $\times$  Gradient method to quantify  
 167 the sensitivity of the model output to local feature variations. The importance score  
 168 ( $I_{feat}$ ) for a specific feature at a specific vertical layer is calculated as the ensemble  
 169 average of the absolute gradients weighted by the input magnitude:

$$170 \quad I_{feat} = \frac{1}{M} \sum_{m=1}^M \left( \frac{1}{N} \sum_{n=1}^N \left| x_{feat}^{(n)} \odot \frac{\partial \mathcal{F}_m(x^{(n)})}{\partial x_{feat}^{(n)}} \right| \right) \quad (S17)$$

171 where:  $N$  is the total number of samples in the validation set.  $M$  is the number of  
 172 cross-validation folds (here  $M = 5$ ).  $x_{feat}^{(n)}$  denotes the input value of a specific feature  
 173 for the  $n$ -th sample.  $\partial \mathcal{F}_m(\cdot)$  represents the model prediction function for the  $m$ -th  
 174 fold.  $\odot$  denotes element-wise multiplication.

175 **b. Global Attention Mechanism**

176 Global Attention Mechanism For global meteorological covariates (i.e., 2D single-  
 177 layer variables from MERRA-2), we analyze the Cross-Attention weights extracted  
 178 from the Transformer decoder. The global average attention score ( $\bar{A}_{ij}$ ) represents the  
 179 interaction strength between the  $i$ -th vertical layer of the profile and the  $j$ -th global  
 180 variable (e.g., PBLH, Surface Pressure). It is computed by averaging across all attention  
 181 heads and all samples:

$$182 \quad \bar{A}_{ij} = \frac{1}{N} \sum_{n=1}^N \frac{1}{H} \sum_{h=1}^H A_{ij}^{(n,h)} \quad (S18)$$

183 where:  $H$  is the number of attention heads.  $N$  is the total number of samples in the  
 184 dataset.  $A_{ij}^{(n,h)}$  is the attention weight matrix from the  $h$ -th head for the  $n$ -th sample.

185 The inner summation averages the contributions from multi-head attention mechanisms,

186 while the outer summation computes the dataset-wide average contribution of each  
 187 global variable, filtering out sample-specific noise.

### 188 **c. Gated Fusion Weights**

189 The model dynamically fuses information from different sources using learnable  
 190 scalar weights. The effective contribution weight ( $W_c$ ) for a specific component  $c$  at  
 191 altitude  $z$  is formalized as:

$$192 \quad W_c(z) = \sigma \left( \frac{1}{N} \sum_{n=1}^N \omega_c^{(n)}(z) \right) \quad (S19)$$

193 where  $\omega_c^{(n)}(z)$  is the raw gate value predicted by the model for sample  $n$  at altitude  
 194  $z$ , and  $\sigma(\cdot)$  represents the normalization function (e.g., Softmax) ensuring the weights  
 195 sum to 1.

### 196 **d. Permutation Feature Importance**

197 To assess the model's reliance on specific feature groups (e.g., Profile Features vs.  
 198 Global Variables), we calculate the percentage increase in MSE when a feature group  
 199 is randomly permuted. The importance score ( $S_k$ ) for feature group  $k$  is defined as:

$$200 \quad S_k = \frac{\mathcal{L}_{perm,k} - \mathcal{L}_{base}}{\mathcal{L}_{base}} \times 100\% \quad (S20)$$

$$201 \quad \mathcal{L}_{base} = \frac{1}{N} \sum_{n=1}^N (y^{(n)} - \hat{y}^{(n)})^2 \quad (S21)$$

202 where:  $\mathcal{L}_{base}$  is the baseline MSE on the original validation set.  $\mathcal{L}_{perm,k}$  is the MSE  
 203 calculated after randomly shuffling the feature group  $k$  along the batch dimension  
 204 while keeping other features fixed.

## 205 **S8. Implementation of SHAP Analysis**

206 To efficiently compute SHAP values for the deep neural network while  
207 maintaining statistical representativeness, we adopt a clustering-based sampling  
208 strategy for the background dataset:

### 209 **a. Representative Background Selection**

210 Instead of using a random subset or the zero-mean baseline (which is physically  
211 unrealistic for atmospheric variables), we apply K-means clustering on the normalized  
212 training dataset. We set the number of clusters  $k=100$  and selected the medoids (samples  
213 closest to the cluster centers) to form a background dataset. This ensures that the  
214 reference baseline covers the full manifold of atmospheric states, from clean  
215 background days to severe pollution episodes.

### 216 **b. Target Sample Selection**

217 For regional analysis, we select top-50 samples with the highest model corrections  
218 (i.e., large initial GEOS-Chem biases that were successfully corrected by the model)  
219 within each region of interest. This "Case Study Strategy" ensures that the SHAP  
220 explanation focuses on the most significant bias correction events rather than trivial  
221 noise.

222 **S9. Supplementary Evaluation of the Overall Model**

223 Table S2. Summary of model performance for AEC simulation biases ( $\Delta_{AEC}$ ) on the  
224 validation subsets derived from the 5-fold spatial cross-validation strategy during the  
225 training phase.

| Experiment ID | R (Val) | MAE (Val) | RMSE (Val) |
|---------------|---------|-----------|------------|
| Exp-2017      | 0.629   | 0.015     | 0.042      |
| Exp-2018      | 0.652   | 0.015     | 0.041      |
| Exp-2019      | 0.609   | 0.015     | 0.042      |
| Average       | 0.630   | 0.015     | 0.042      |

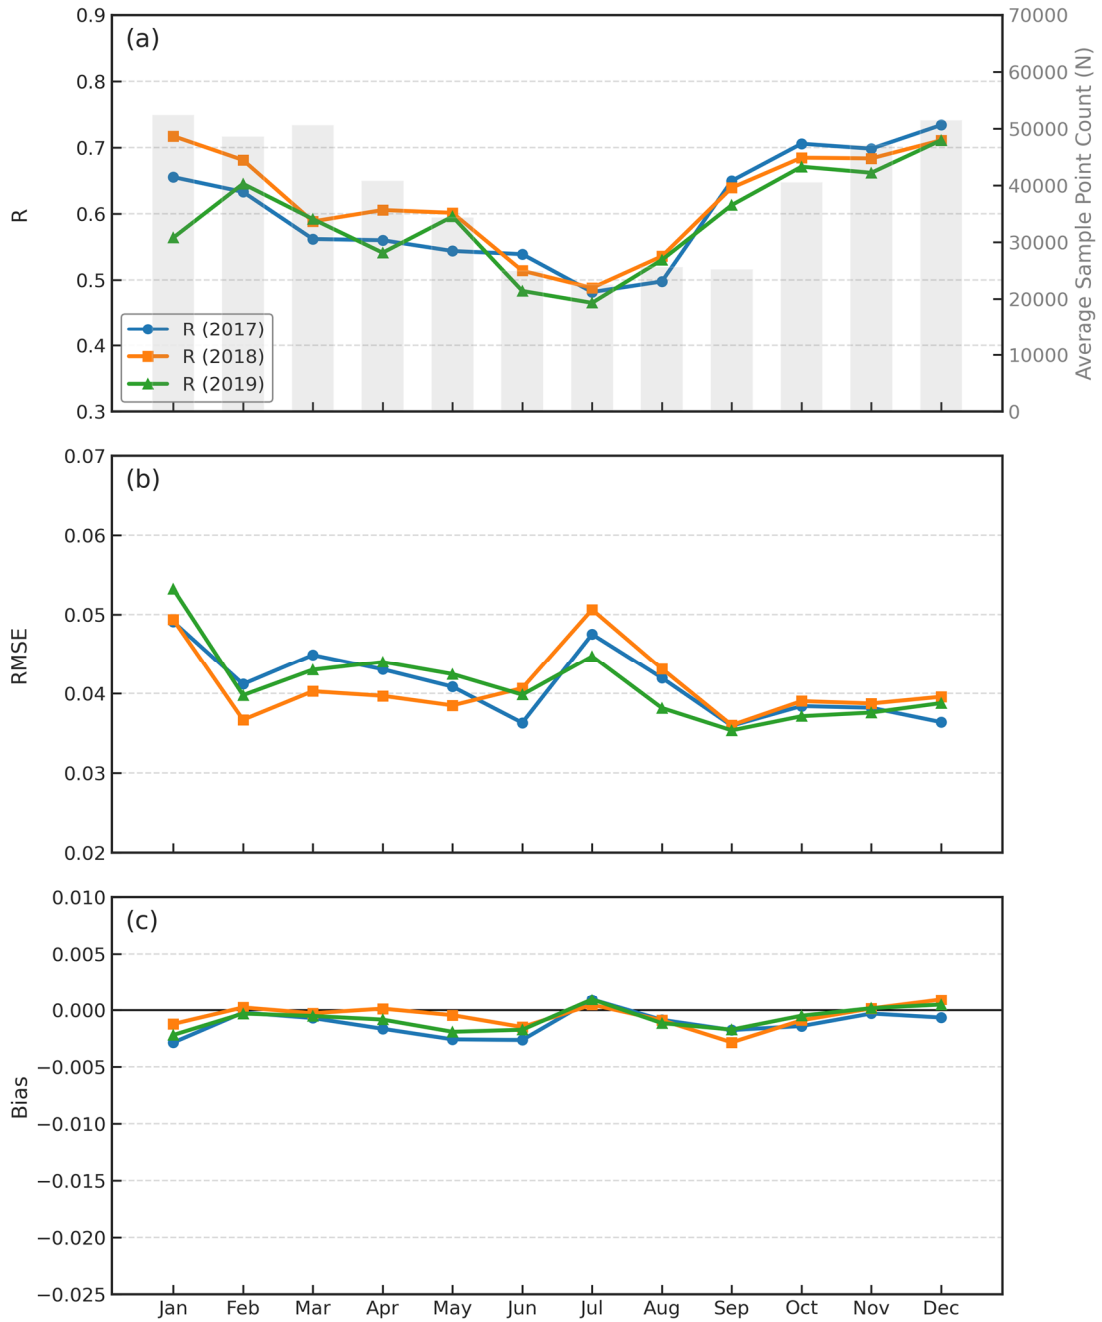

226

227 Figure S2. Monthly variations of the statistical evaluation metrics (derived from the 5-  
 228 fold cross-validation validation subsets) for assessing the physics-informed  
 229 Transformer model's performance in predicting the AEC simulation bias ( $\Delta_{AEC}$ ). The  
 230 panels display the time series of R (a) with the multi-year average monthly sample size  
 231 (N, gray bars), RMSE (b), and mean bias (c).

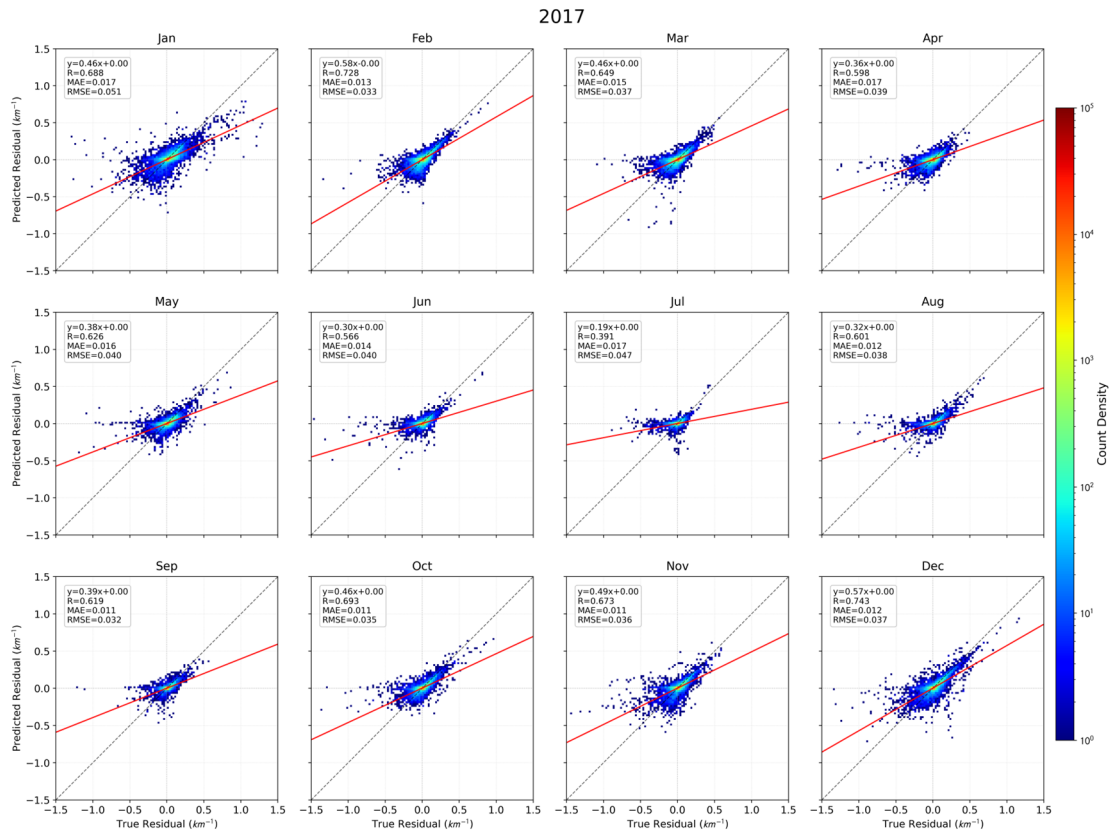

232

233 Figure S3. Monthly density scatter plots comparing the predicted AEC simulation bias  
 234 (y-axis) generated by the physics-informed Transformer against the true residuals (x-  
 235 axis) for the year 2017. The true residual is defined as the difference between the  
 236 original GEOS-Chem simulation AEC and CALIOP observation AEC (GEOS-  
 237 Chem – CALIOP).

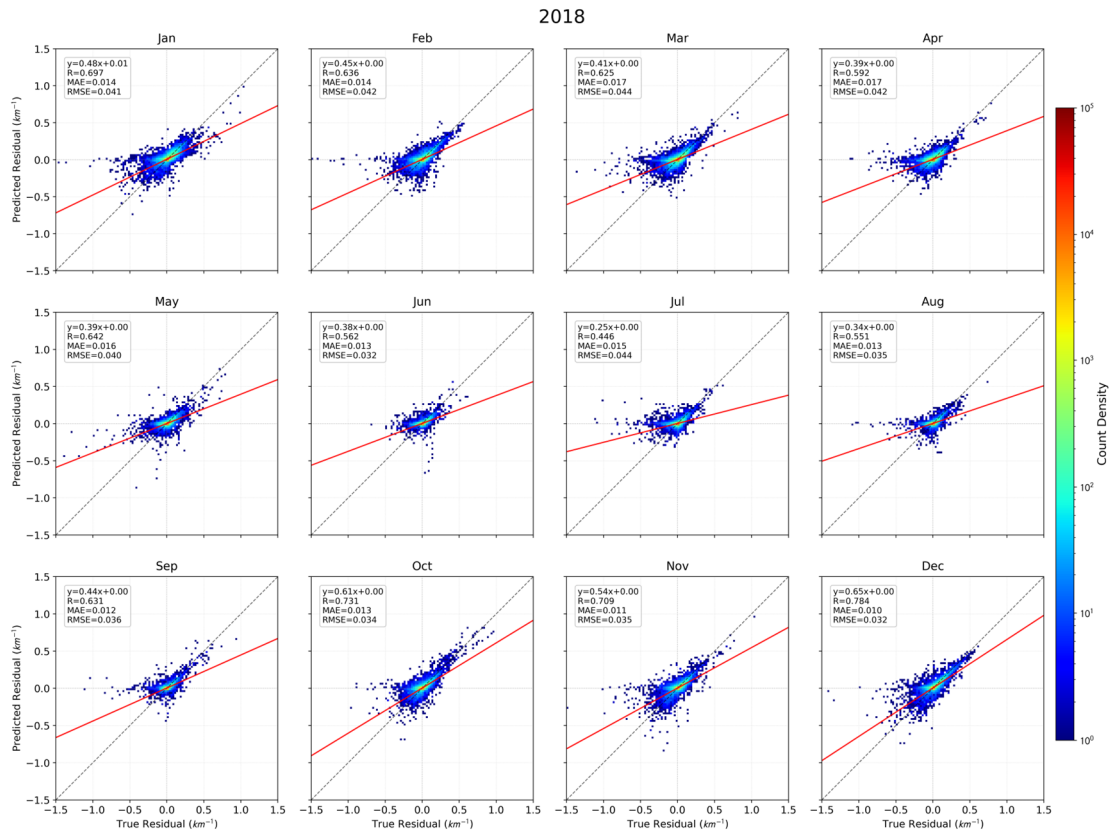

238

239 Figure S4. Monthly density scatter plots comparing the predicted AEC simulation bias  
 240 (y-axis) generated by the physics-informed Transformer against the true residuals (x-  
 241 axis) for the year 2018.

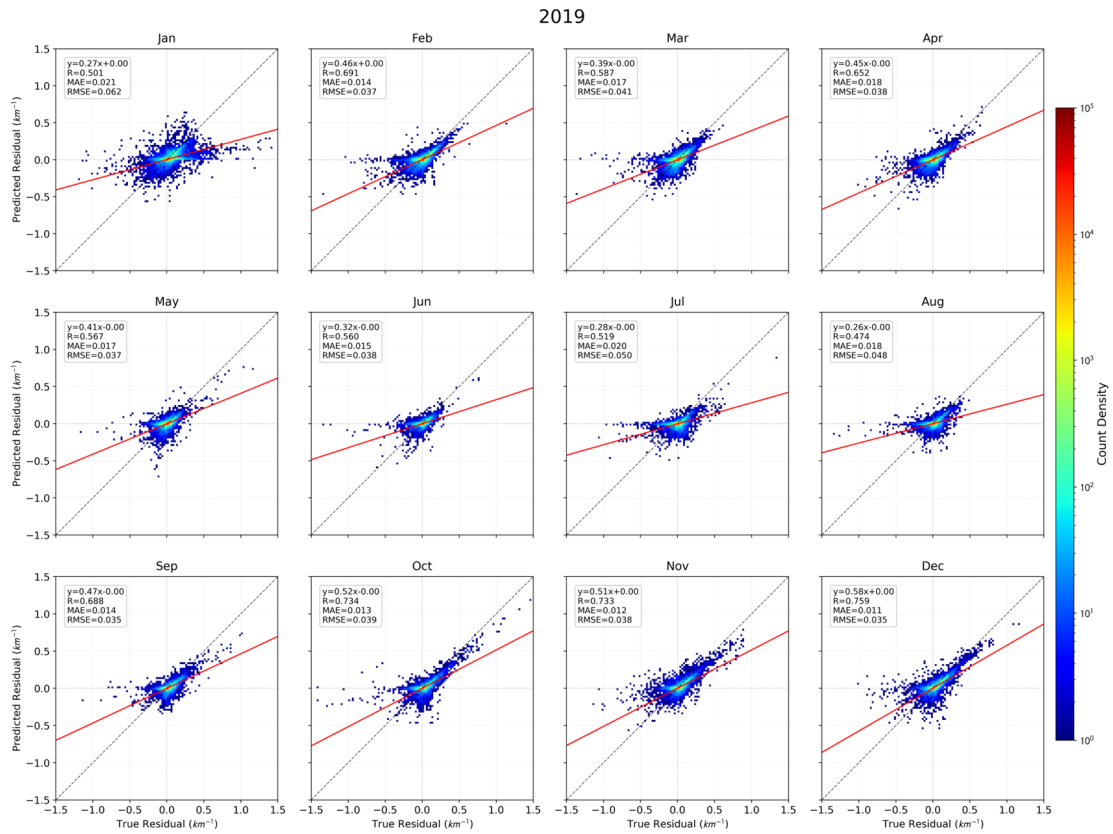

242

243 Figure S5. Monthly density scatter plots comparing the predicted AEC simulation bias  
 244 (y-axis) generated by the physics-informed Transformer against the true residuals (x-  
 245 axis) for the year 2019.

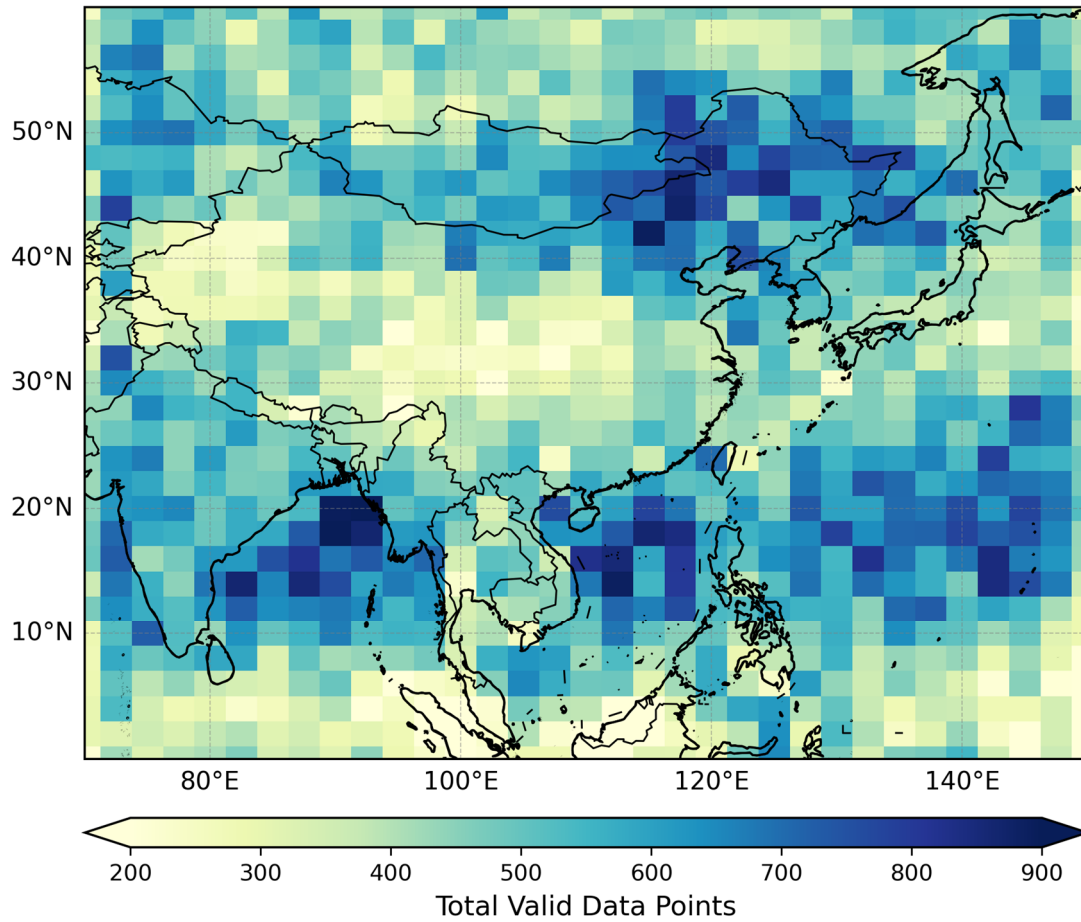

246

247 Figure S6. Spatial distribution of valid CALIOP data points aggregated for the test year

248 2019.

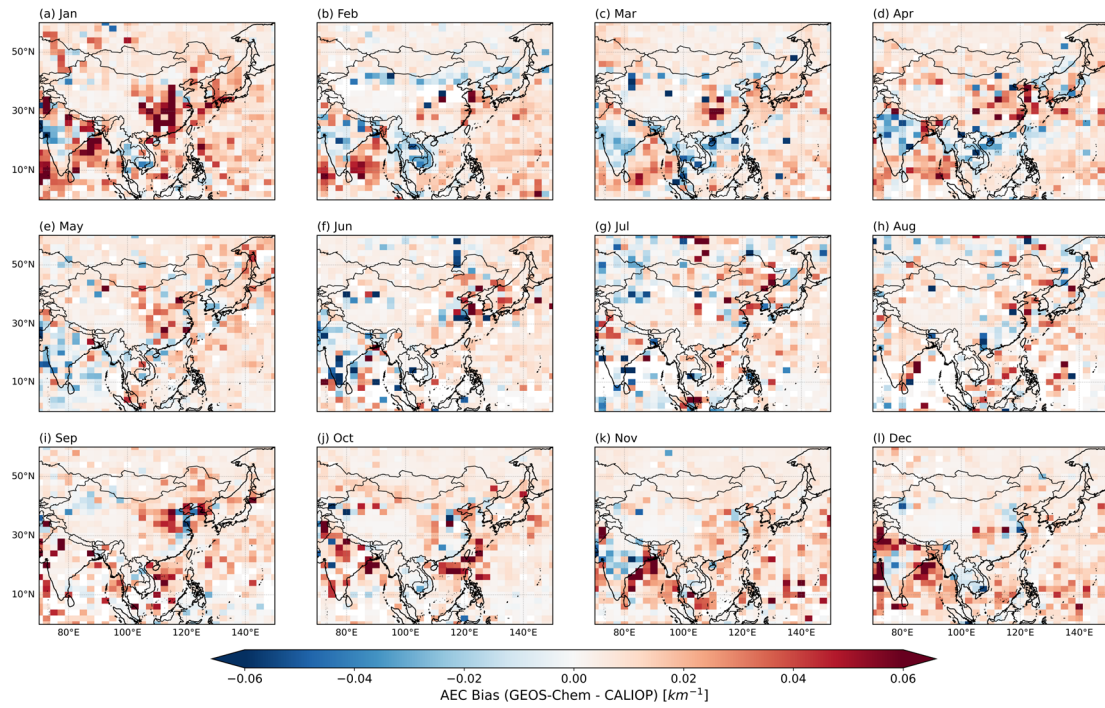

249

250 Figure S7. Monthly spatial evolution of the Target AEC simulation bias ( $\Delta_{AEC}$ ) for the  
 251 test year 2019.

## 252 S10. Analysis of Residual Outliers

253 This section analyzes the samples where the absolute residuals between the model-  
254 corrected AEC and CALIOP observations exceed  $0.15 \text{ km}^{-1}$  (i.e., points falling outside  
255 the error envelope in Fig. 6). The diagnostic results presented in Figure S8 demonstrate  
256 that these outliers are not randomly distributed but exhibit specific spatial and vertical  
257 characteristics.

258 Spatially (Fig. S8a), regions with elevated outlier occurrence are predominantly  
259 anchored over major emission source regions, including the IGP, the NCP, and the  
260 Indochina Peninsula. Vertically (Fig. S8b), over 80% of these extreme deviations are  
261 confined within the PBL (below 1.5 km AGL), an altitude range characterized by the  
262 heaviest local aerosol loading and the most intense turbulent mixing.

263 These distribution patterns confirm that the dispersion observed in the scatter plots  
264 fundamentally originates from representativeness errors. In complex source regions, the  
265 high-resolution footprint of CALIOP resolves transient, highly concentrated sub-grid  
266 plumes. The fine-scale physical structures of these plumes are inherently smoothed out  
267 during the spatial averaging onto the coarse  $2^\circ \times 2.5^\circ$  grid of the GEOS-Chem model.  
268 We attribute the remaining 1.20% of outlier samples primarily to the spatial  
269 heterogeneity of aerosols that lies below the resolvable scale of the model grid.

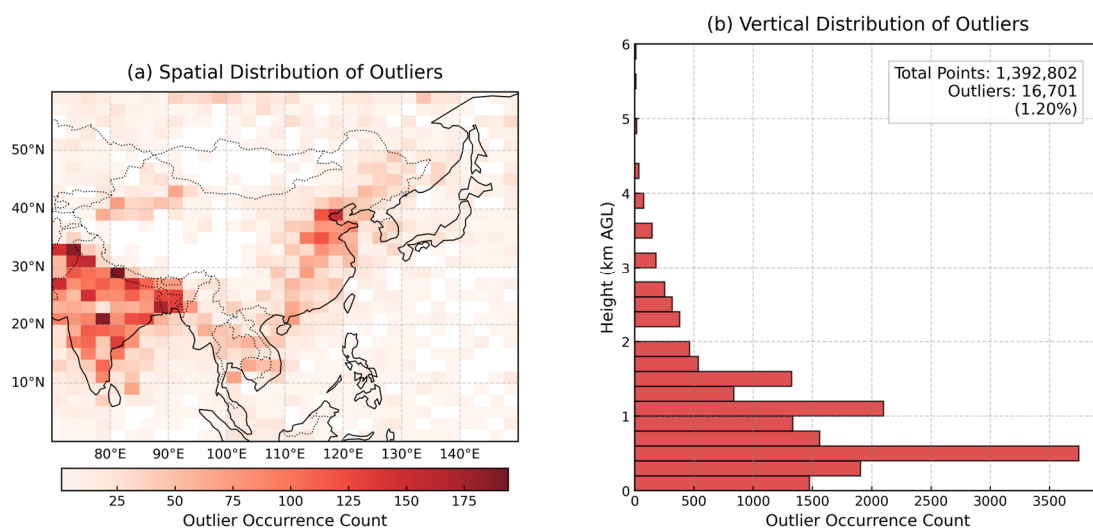

270

271 Figure S8. Spatial and vertical distributions of the residual outliers for the combined  
272 test years (2017–2019). Outliers are strictly defined as samples where the absolute

273 residual between the GC-TF prediction and CALIOP observation exceeds  $\pm 0.15 \text{ km}^{-1}$ .  
274 The panels display (a) the spatial occurrence count of these outliers mapped onto the  
275 native  $2^\circ \times 2.5^\circ$  GEOS-Chem grid, and (b) their vertical distribution as a function of  
276 height AGL. The statistical box indicates that these extreme deviations account for  
277 merely 1.20% of the total valid dataset.

278 **S11. Supporting Information for Improvement Evaluation of GEOS-Chem**  
279 **Simulations**

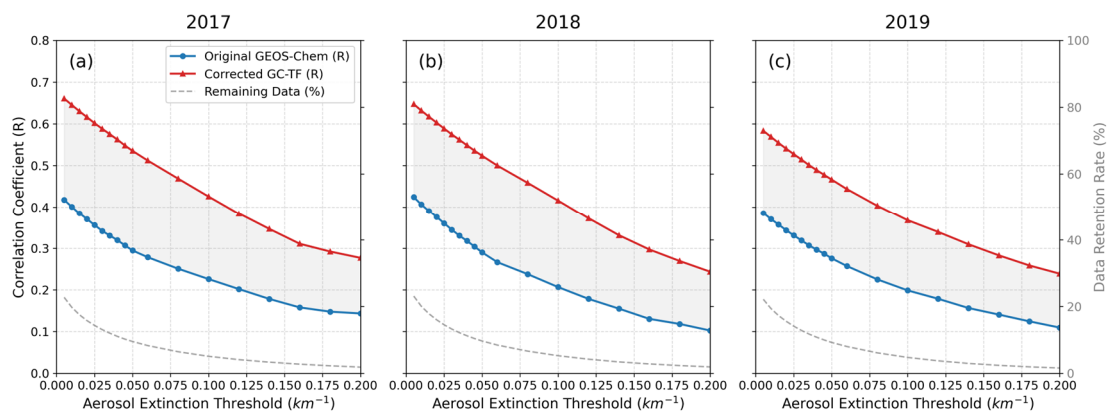

280

281 Figure S9. Sensitivity of model predictive performance to AEC thresholds across three  
282 independent test years (2017–2019). The gray dashed line (corresponding to the right  
283 axis) indicates the data retention rate, representing the percentage of valid samples  
284 remaining after filtering out clean background signals below the threshold

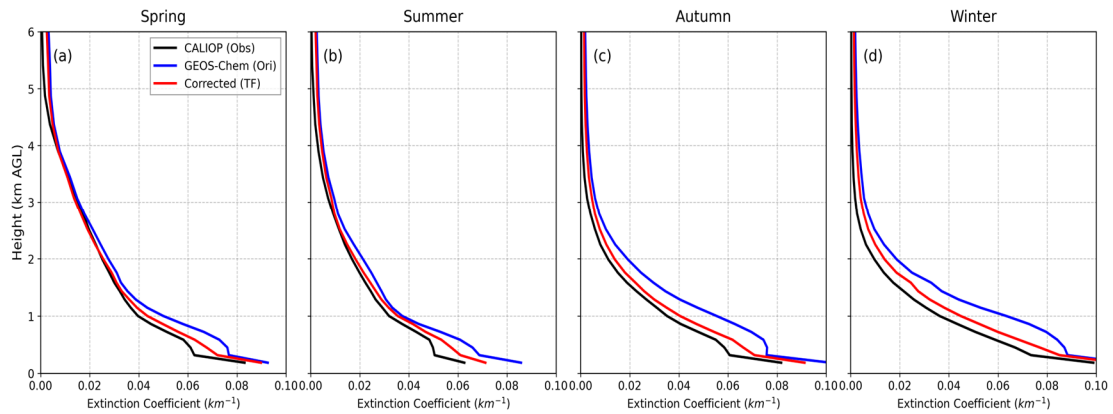

285

286 Figure S10. Seasonal mean vertical profiles of AEC ( $\text{km}^{-1}$ ) averaged over the three test  
 287 years (2017–2019). The panels display the profiles for Spring (MAM, a), Summer (JJA,  
 288 b), Autumn (SON, c), and Winter (DJF, d). The black lines represent the CALIOP  
 289 observations, the blue dashed lines denote the original GEOS-Chem simulations, and  
 290 the red lines show the results corrected by the GC-TF model. The profiles are vertically  
 291 resolved from the surface to 6 km above ground level (AGL).

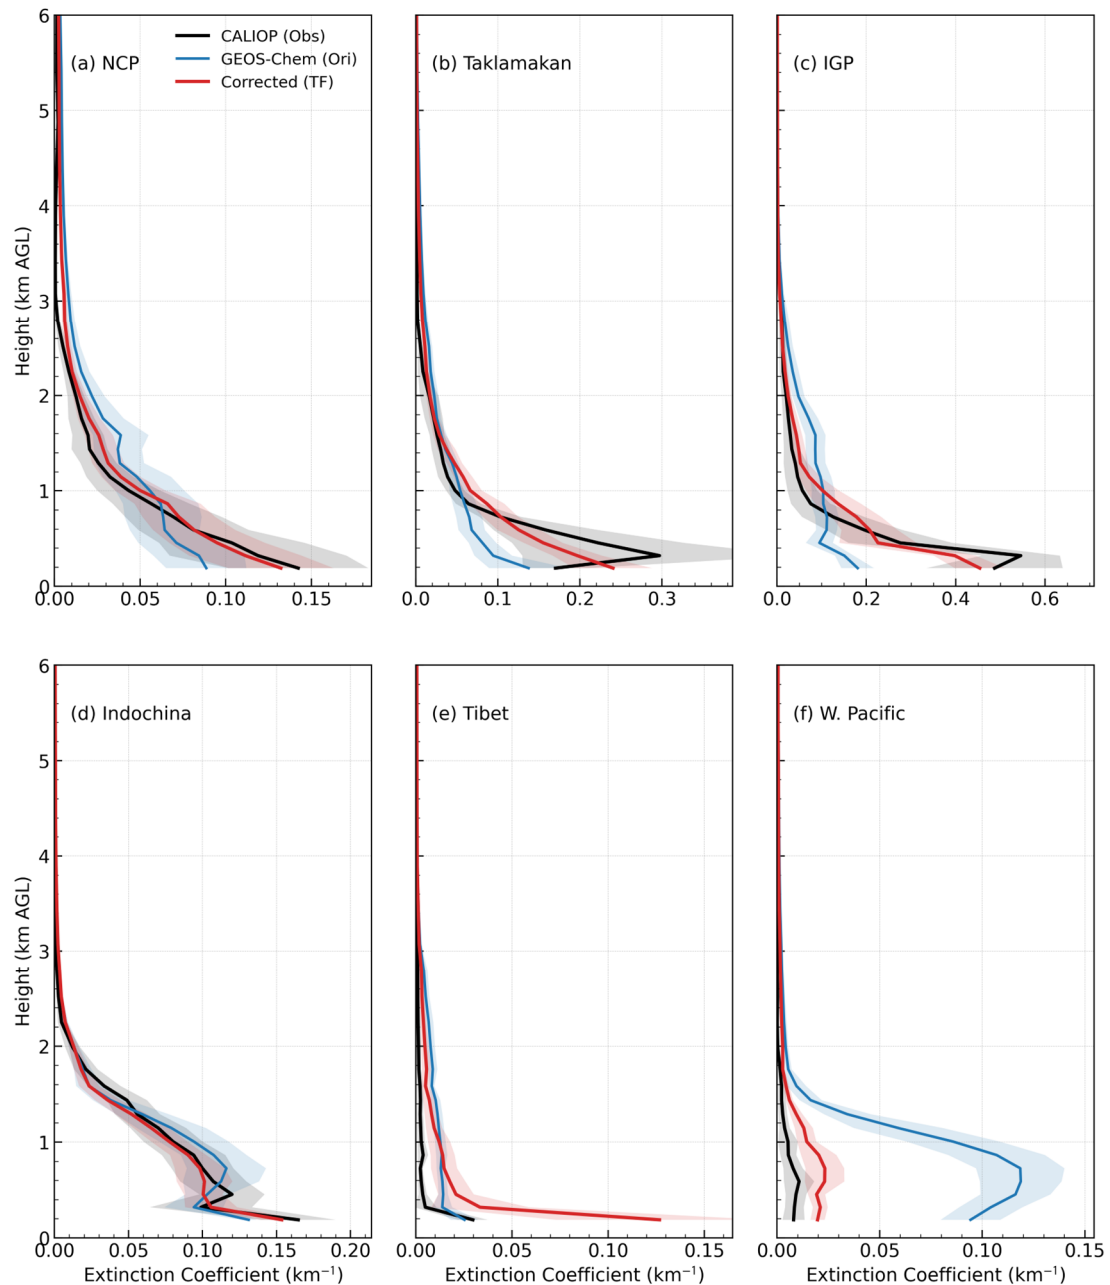

292

293 Figure S11. Regional annual mean vertical profiles of AEC over six representative sub-  
 294 regions for the test year 2017. The panels display the profiles for NCP (a), Taklamakan  
 295 Desert (b), IGP (c), Indochina (d), Tibetan Plateau (e), and Western Pacific (f). The  
 296 black lines represent CALIOP observations, the blue dashed lines denote the original  
 297 GEOS-Chem simulations, and the red lines show the results corrected by the GC-TF  
 298 model. The shaded areas indicate the regional standard deviation ( $\pm 0.5\sigma$ ), representing  
 299 the spatial variability within each sub-region.

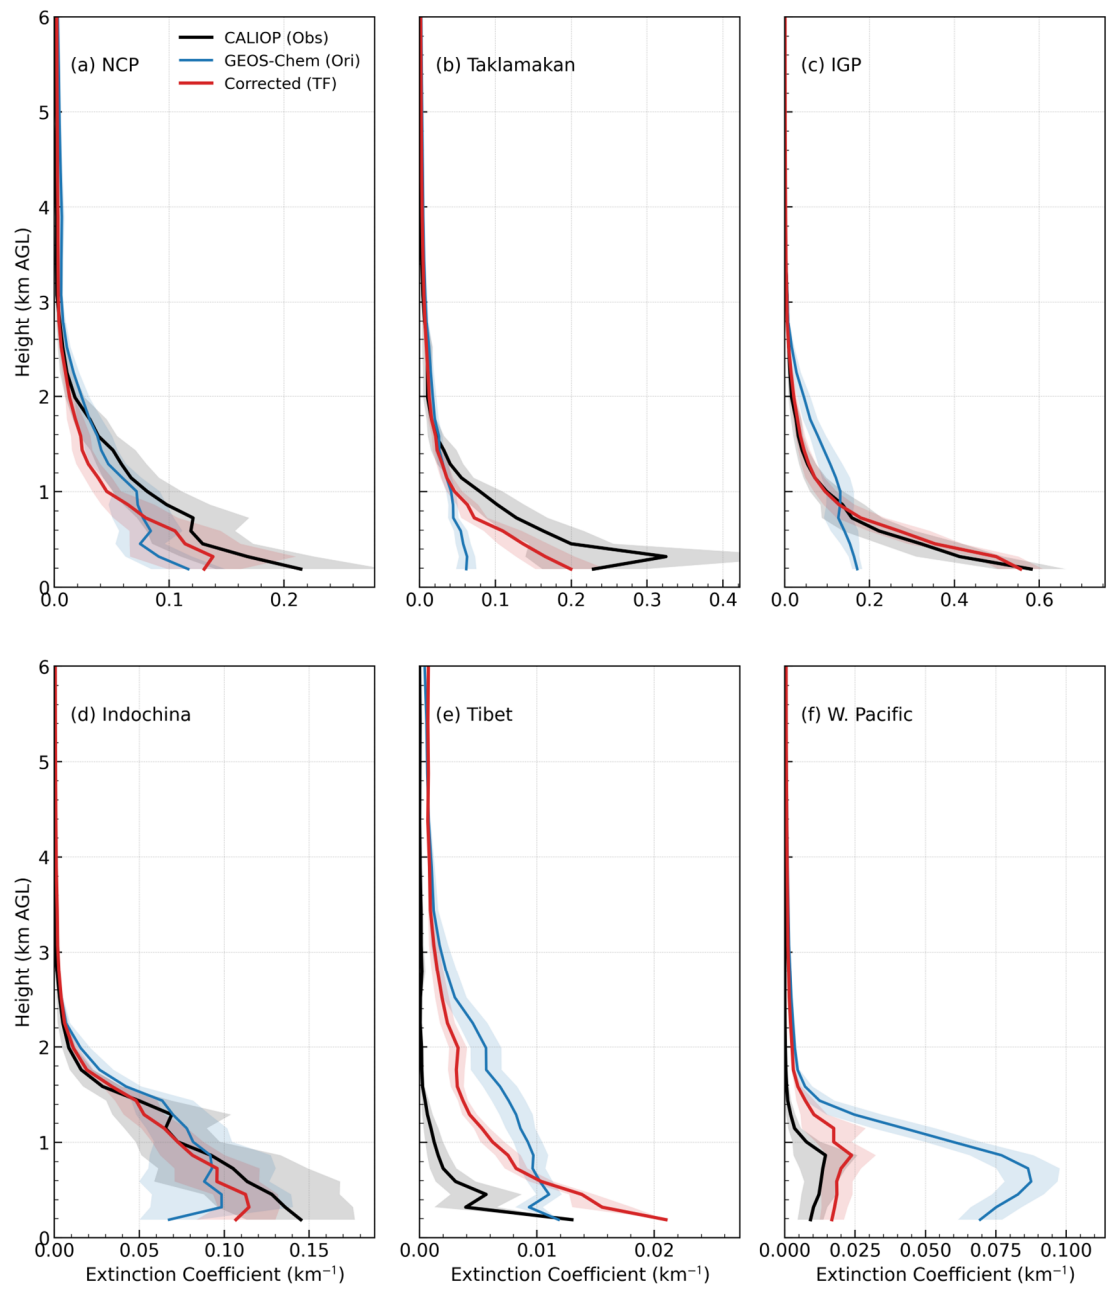

300

301 Figure S12. Regional annual mean vertical profiles of AEC over six representative sub-  
 302 regions for the test year 2018.

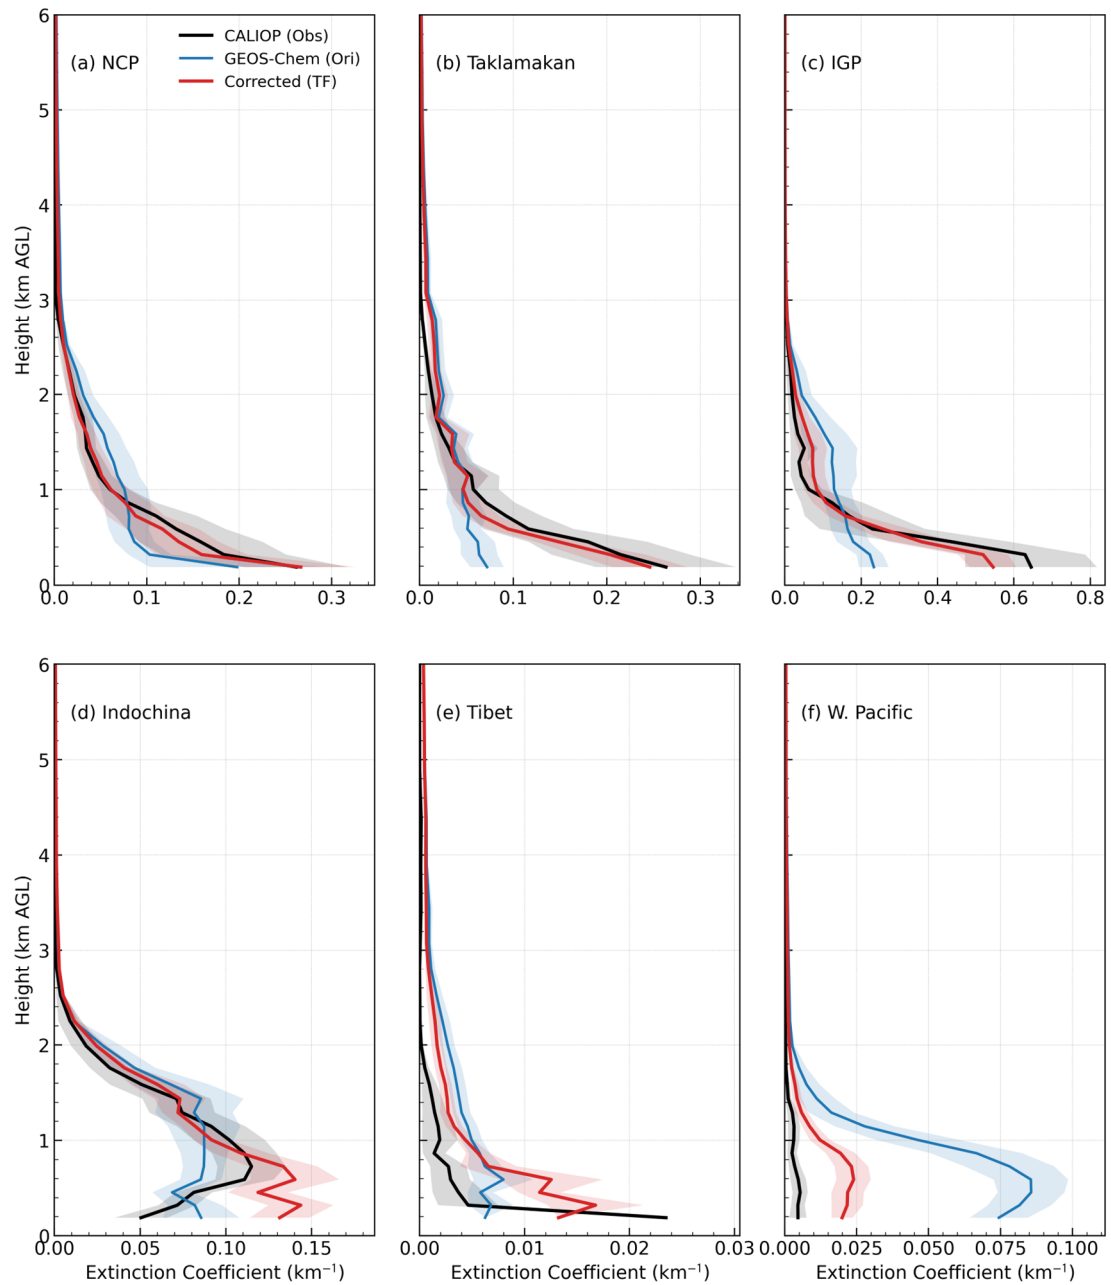

303

304

Figure S13. Regional annual mean vertical profiles of AEC over six representative sub-

305

regions for the test year 2019.

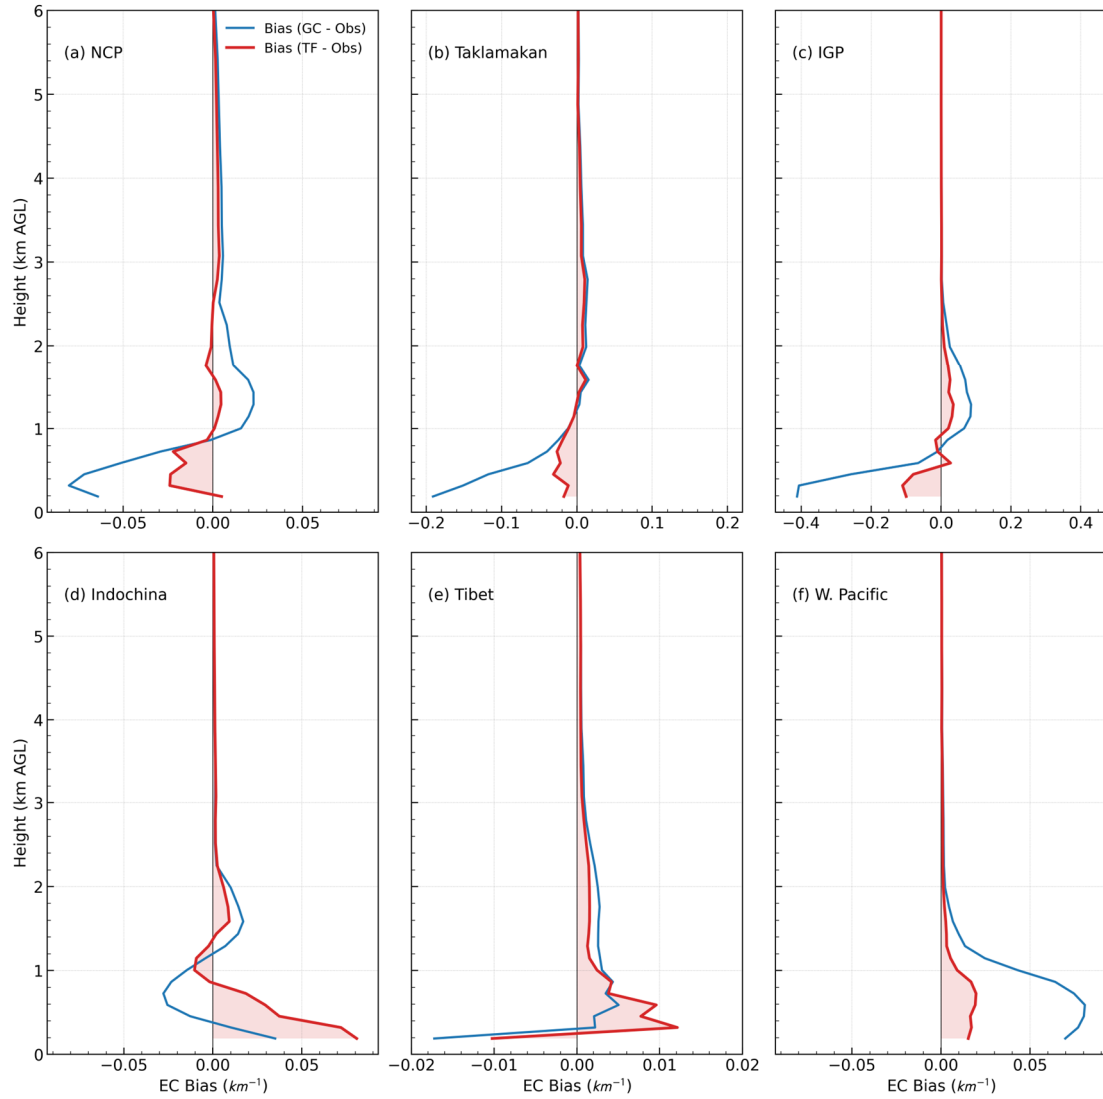

306

307 Figure S14. Vertical profiles of the annual mean AEC simulation bias over six  
 308 representative sub-regions for the test year 2019. The panels display the bias profiles  
 309 for NCP (a), Taklamakan Desert (b), IGP (c), Indochina (d), Tibetan Plateau (e), and  
 310 Western Pacific (f). The AEC bias is calculated as Model minus Observation. The blue  
 311 lines represent the original GEOS-Chem bias (GEOS-Chem–CALIOP), while the red  
 312 lines denote the remaining bias after GC-TF correction (GC-TF – CALIOP). The  
 313 vertical black line indicates the zero-bias reference, and the shaded red areas highlight  
 314 the magnitude of the residual bias after correction.

315 **S12. Supporting Information for Interpretability Analysis**

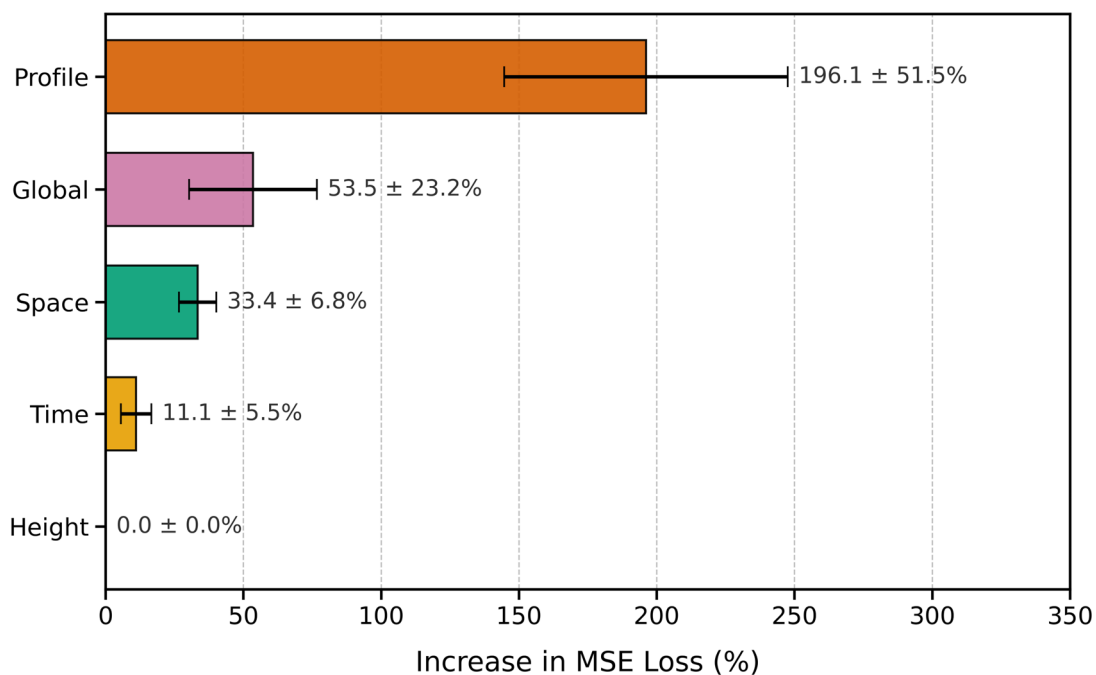

316

317 Figure S15. Permutation feature importance analysis evaluated on the test dataset. The  
318 importance of each feature group is quantified by the relative increase in MSE loss  
319 when the values of that feature group are randomly shuffled, while keeping others  
320 unchanged. The error bars represent the standard deviation across the 5-fold cross-  
321 validation. Note that Profile Features are identified as the most critical input, causing a  
322 ~200% surge in error if disrupted, confirming the model's heavy reliance on physical  
323 state variables for magnitude prediction.

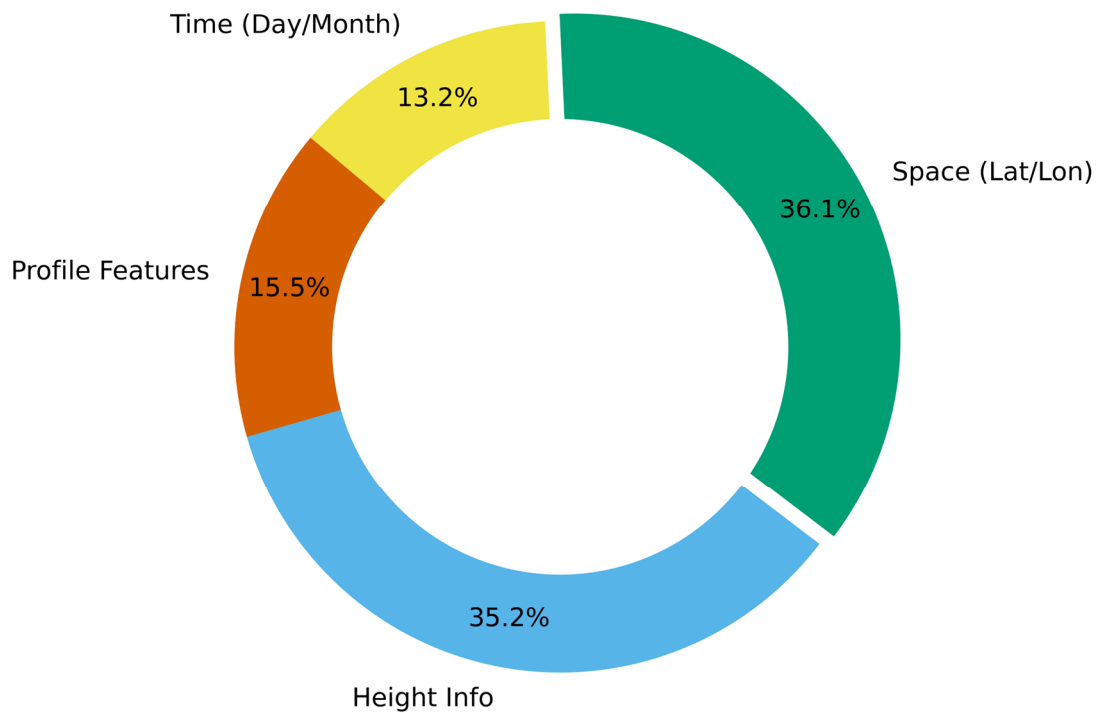

324

325 Figure S16. Global average relative importance of the input features learned by the  
326 physics-informed model for the test year 2019. The pie chart displays the percentage  
327 contribution of four feature groups: Space (36.1%), Height Info (35.2%), Profile  
328 Features (15.5%, including GEOS-Chem chemical concentrations and MERRA2  
329 meteorology), and Time (13.2%). The dominance of spatial and height information  
330 reflects the strong spatial heterogeneity and vertical stratification of aerosol  
331 distributions.

### 332 **S13. Sensitivity Analysis of CALIOP Observational Uncertainties**

333 To quantitatively evaluate the model's sensitivity to the inherent systematic  
334 uncertainties of CALIOP observations, we design a perturbation experiment based on  
335 the 2017 independent test set. Considering the reported mean relative bias of CALIOP  
336 AOD against AERONET is approximately  $-5.1\% \pm 8.5\%$ , we artificially apply a  
337 constant  $\pm 5\%$  multiplier to the CALIOP AEC targets during the training phase. This  
338 creates two extreme scenarios: one simulating a severe systematic underestimation ( $-5\%$   
339 bias) and another simulating a systematic overestimation ( $+5\%$  bias). The physics-  
340 informed Transformer is then retrained from scratch for both scenarios, and the newly  
341 predicted residual profiles are added back to the original GEOS-Chem simulations to  
342 obtain the final perturbed corrected AEC profiles.

343 As presented in Table S3, the GC-TF model exhibits strong resistance to target  
344 perturbations. Even with a 5% systematic error injected into the learning target, the  
345 model's RMSE and Mean Bias remain highly stable and significantly superior to the  
346 original GEOS-Chem baseline. Visually, Figure S17 illustrates that the perturbed  
347 predictions (dashed and dotted lines) tightly hug the unperturbed baseline correction  
348 (solid red line), forming a narrow perturbation range (red shaded area) that aligns well  
349 with the CALIOP observations. This demonstrates that the data-driven correction  
350 framework captures robust physical mappings rather than merely overfitting to  
351 observational noise.

352

353

354

355

356

357

358

359

360 Table S3. Quantitative evaluation of the GC-TF model's sensitivity to CALIOP  
 361 observational uncertainties on the 2017 independent test set. The metrics are derived  
 362 by validating both the original GEOS-Chem simulations and the corrected GC-TF  
 363 results against the unperturbed CALIOP AEC profiles.

| Model/Scenario               | RMSE  | MAE   | Mean Bias | R     |
|------------------------------|-------|-------|-----------|-------|
| Original GEOS-Chem           | 0.052 | 0.020 | 0.006     | 0.522 |
| Baseline GC-TF (Unperturbed) | 0.039 | 0.014 | 0.002     | 0.732 |
| GC-TF (-5% CALIOP Bias)      | 0.040 | 0.014 | 0.001     | 0.716 |
| GC-TF (+5% CALIOP Bias)      | 0.040 | 0.015 | 0.004     | 0.718 |

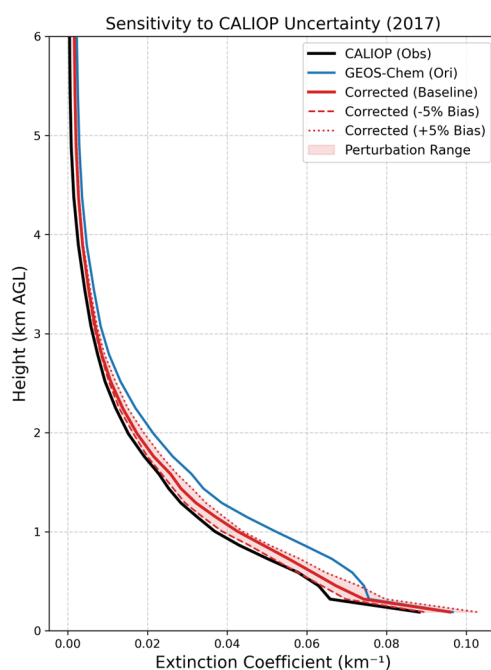

364  
 365 Figure S17. Vertical profiles illustrating the sensitivity of the corrected AEC to target  
 366 perturbations for the test year 2017. The black solid line represents the CALIOP  
 367 observations, and the blue solid line represents the original GEOS-Chem simulation.  
 368 The red solid line indicates the baseline correction of the GC-TF model trained on  
 369 unperturbed data. The dashed and dotted red lines represent the corrected profiles  
 370 generated by models trained with -5% and +5% perturbed CALIOP targets, respectively.  
 371 The light red shaded area denotes the envelope of variation (Perturbation Range)  
 372 induced by these observational uncertainties.

373 **S14. Stratified Evaluation by Aerosol Subtypes**

374 To evaluate the model performance under distinct aerosol composition regimes,  
 375 we utilize the Feature Classification Flags embedded in the CALIOP Level 2  
 376 Atmospheric Volume Description. The NA evaluation dataset (2018) is partitioned into  
 377 two representative subsets: a dust-dominated regime (combining 'Dust' and 'Polluted  
 378 Dust' subtypes) and an SOA-dominated continental regime (combining 'Clean  
 379 Continental' and 'Polluted Continental/Smoke' subtypes).

380

381 Table S4. Statistical evaluation of GC-TF model performance over NA, stratified by  
 382 dominant CALIOP aerosol subtypes (2018). For each subset, we calculate statistical  
 383 metrics for both the original GEOS-Chem simulation and the GC-TF corrected  
 384 predictions against CALIOP AOD observations.

| Aerosol Regime                                       | Model     | R    | RMSE  | MAE   | Slope |
|------------------------------------------------------|-----------|------|-------|-------|-------|
| Dust-dominated<br>(Dust and Polluted<br>Dust)        | Original  | 0.41 | 0.032 | 0.027 | 0.21  |
|                                                      | Corrected | 0.50 | 0.032 | 0.027 | 0.32  |
| SOA-dominated<br>(Clean and Polluted<br>Continental) | Original  | 0.51 | 0.034 | 0.031 | 0.27  |
|                                                      | Corrected | 0.50 | 0.035 | 0.031 | 0.30  |

385

## 386 **S15. Methodological Benchmarking and Structural Necessity**

387 To justify the architectural complexity of the proposed framework and isolate the  
388 sources of its performance gains, we conduct comprehensive benchmarking and  
389 ablation studies using the independent 2017 test dataset. To ensure a strictly fair  
390 comparison, all baseline models and ablation variants are trained using the identical set  
391 of input predictors—encompassing GEOS-Chem physicochemical states and MERRA-  
392 2 meteorological forcings—along with identical hyperparameter configurations and  
393 loss functions.

394 To establish a comprehensive baseline, two representative conventional deep  
395 learning architectures were evaluated. The first is a Multilayer Perceptron (MLP),  
396 representing point-wise neural networks. By treating vertical layers as independent  
397 vectors, the MLP tests whether a simple numerical mapping, devoid of sequential  
398 awareness, can resolve AEC biases. The second baseline is a 1-Dimensional  
399 Convolutional Neural Network (1D-CNN). This architecture utilizes localized  
400 receptive fields to capture vertical gradients between adjacent layers, serving as a  
401 benchmark for local structural extraction, contrasting with the global dependency  
402 modeling enabled by the Transformer.

403 Table S5. Performance benchmarking and ablation study of the proposed model against  
404 conventional machine learning architectures. Evaluation is conducted on the  
405 independent 2017 test dataset. All models are trained utilizing the identical  
406 meteorological and chemical state predictors to ensure a rigorous comparison.

| Model Configuration                 | R     | MAE (km <sup>-1</sup> ) | RMSE (km <sup>-1</sup> ) |
|-------------------------------------|-------|-------------------------|--------------------------|
| MLP                                 | 0.083 | 0.019                   | 0.052                    |
| 1D-CNN                              | 0.540 | 0.016                   | 0.044                    |
| Without Gated Fusion                | 0.637 | 0.015                   | 0.040                    |
| Without Cross-Attention             | 0.654 | 0.014                   | 0.039                    |
| Physics-Informed Transformer (Full) | 0.666 | 0.014                   | 0.039                    |

407
